# Supplementary material for: Upregulation of Receptor Tyrosine Kinase Activity and Stemness as Resistance Mechanisms to Akt Inhibitors in Breast Cancer
Source: MDPI journal article supplement (doi:10.3390/cancers14205006), 2022-10-13
Supplement: s1 [file s1]

|             |             |             |               |                 |                |                |                |                  |              |               |              |
|-------------|-------------|-------------|---------------|-----------------|----------------|----------------|----------------|------------------|--------------|---------------|--------------|
| B1<br>EGFR  | B3<br>ErbB2 | B5<br>ErbB3 | B7<br>ErbB4   | B9<br>FGF R1    | B11<br>FGF R2a | B13<br>FGF R3  | B15<br>FGF R4  | B17<br>Insulin R | B19<br>IGF1R | B21<br>Axl    | B23<br>Dtk   |
| C1<br>Mer   | C3<br>HGF R | C5<br>MSP R | C7<br>PDGF Ra | C9<br>PDGF Rbet | C11<br>SCF R   | C13<br>Flt-3   | C15<br>M-CSF R | C17<br>c-Ret     | C19<br>ROR1  | C21<br>ROR2   | C23<br>Tie-1 |
| D1<br>Tie-2 | D3<br>TrkA  | D5<br>TrkB  | D7<br>TrkC    | D9<br>VEGF R1   | D11<br>VEGF R2 | D13<br>VEGF R3 | D15<br>MusK    | D17<br>EphA1     | D19<br>EphA2 | D21<br>EphA3  | D23<br>EphA4 |
| E1<br>EphA6 | E3<br>EphA7 | E5<br>EphB1 | E7<br>EphB2   | E9<br>EphB4     | E11<br>EphB6   | E13<br>ALK     | E15<br>DDR1    | E17<br>DDR2      | E19<br>EphA5 | E21<br>EphA10 |              |
|             |             | F5<br>EphB3 | F7<br>RYK     |                 |                |                |                |                  |              |               |              |

**Figure S1.** Position of 49 different RTK antibodies on the membrane of phospho-RTK arrays. Each antibody spotted in duplicate.

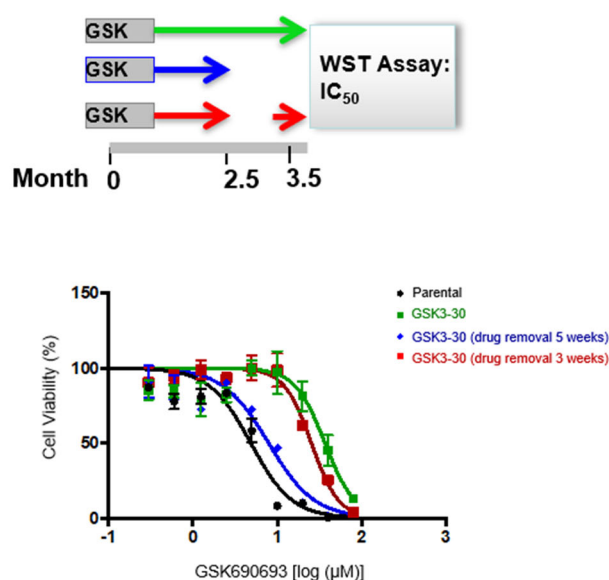

**Figure S2. Reversibility of drug resistance to Akt inhibitor.** To assess the ability of MDA-MB-231<sup>R</sup> (GSK690693 3-30) cells to regain resistance after drug removal, a fraction of cells that have been cultured in the absence of drug for 3 weeks were re-challenged with GSK690693 for 2 weeks, followed by WST assays.
